# Supplementary material for: NYC START: A New Model for Securing Community Services for Individuals Hospitalized for First-Episode Psychosis
Source: Atypon-hosted journal article supplement (doi:10.1176/appi.ps.201800385), 2019-05-14
Supplement: appi.ps.201800385.ds001.pdf [file appi.ps.201800385.ds001.pdf]

**Online Supplement**  
**Logic Model: NYC START Program**

| <b>INPUTS<br/>(Resources)</b>                                                                                                                                                                                                                                                                                                                                                                                                                                                                                                                                                                                                                                                                                                                                                            | <b>ACTIVITIES<br/>(Program Components)</b>                                                                                                                                                                                                                                                                                                                                                                                                                                                                                                                                                                                                                     | <b>OUTPUTS<br/>(Objectives)</b>                                                                                                                                                                                                                                                                                                                                                                                                                                                                                                                                                                                                                                                                                                                                                                                                                                                                               | <b>SHORT TERM<br/>OUTCOMES</b>                                                                                                                                                                       | <b>LONG TERM<br/>OUTCOMES</b>                                                                                                                                                                            |
|------------------------------------------------------------------------------------------------------------------------------------------------------------------------------------------------------------------------------------------------------------------------------------------------------------------------------------------------------------------------------------------------------------------------------------------------------------------------------------------------------------------------------------------------------------------------------------------------------------------------------------------------------------------------------------------------------------------------------------------------------------------------------------------|----------------------------------------------------------------------------------------------------------------------------------------------------------------------------------------------------------------------------------------------------------------------------------------------------------------------------------------------------------------------------------------------------------------------------------------------------------------------------------------------------------------------------------------------------------------------------------------------------------------------------------------------------------------|---------------------------------------------------------------------------------------------------------------------------------------------------------------------------------------------------------------------------------------------------------------------------------------------------------------------------------------------------------------------------------------------------------------------------------------------------------------------------------------------------------------------------------------------------------------------------------------------------------------------------------------------------------------------------------------------------------------------------------------------------------------------------------------------------------------------------------------------------------------------------------------------------------------|------------------------------------------------------------------------------------------------------------------------------------------------------------------------------------------------------|----------------------------------------------------------------------------------------------------------------------------------------------------------------------------------------------------------|
| <p>Regulatory authority:</p> <ul style="list-style-type: none"> <li>• NYC Health Code</li> <li>• NYC Board of Health</li> </ul> <p>Staff: ( DOHMH)</p> <ul style="list-style-type: none"> <li>• Social Workers</li> <li>• Peer Specialists</li> <li>• Social Work Supervisors</li> <li>• Administrative Assistant</li> <li>• Data Analyst</li> <li>• Program Director</li> </ul> <p>Funding:</p> <ul style="list-style-type: none"> <li>• County government</li> <li>• State aid</li> </ul> <p>Setting:</p> <ul style="list-style-type: none"> <li>• NYC – all boroughs</li> </ul> <p>Materials:</p> <ul style="list-style-type: none"> <li>• Hospital electronic reporting platform</li> <li>• Case management software</li> <li>• Tablet computers</li> <li>• Mobile phones</li> </ul> | <ul style="list-style-type: none"> <li>• Develop centralized electronic reporting platform.</li> <li>• Develop training materials for hospital on electronic reporting</li> <li>• Train NYC START staff to provide the Critical Time Intervention model using a shared-decision making approach to help ensure linkage to care, connect clients to specialized and recovery-oriented services, and support their transition back to the community.</li> <li>• Develop program flyer for hospital providers with eligibility requirements</li> <li>• Develop program brochure for outreach and enrollment</li> <li>• Develop case management medical</li> </ul> | <ul style="list-style-type: none"> <li>• Presentation to NYC hospitals with in-patient psychiatric services on hospital reporting and NYC START program</li> <li>• Program response to hospital notifications within 1 business day</li> <li>• Assignment of eligible individuals hospitalized with FEP to social worker and peer specialist team</li> <li>• Program staff outreach to hospitalized individual to offer and enroll in time-limited services</li> <li>• Program staff interact with referring hospitals, clients, families and other service providers, providing the Critical Time Intervention model including care coordination, peer support, family support, assistance with reducing substance use, assistance with finding housing or employment or with resuming education, and assistance with engaging with outpatient mental health treatment and primary care services.</li> </ul> | <ul style="list-style-type: none"> <li>• Enrollment of eligible individuals in NYC START</li> <li>• Improved attendance at outpatient mental health services following hospital discharge</li> </ul> | <ul style="list-style-type: none"> <li>• Improve engagement with coordinated specialty care services</li> <li>• Maximize mental health recovery outcomes, enrollment in school and employment</li> </ul> |

| <b>INPUTS<br/>(Resources)</b> | <b>ACTIVITIES<br/>(Program Components)</b>                                                                                                                                                                                           | <b>OUTPUTS<br/>(Objectives)</b> | <b>SHORT TERM<br/>OUTCOMES</b> | <b>LONG TERM<br/>OUTCOMES</b> |
|-------------------------------|--------------------------------------------------------------------------------------------------------------------------------------------------------------------------------------------------------------------------------------|---------------------------------|--------------------------------|-------------------------------|
|                               | <p>record system</p> <p>Develop collaborations:</p> <ul style="list-style-type: none"> <li>• OnTrackNY and other specialized FEP treatment service settings</li> <li>• NYC hospitals with in-patient psychiatric services</li> </ul> |                                 |                                |                               |
